# Supplementary material for: Falling hospital and postdischarge mortality following CABG in New South Wales from 2000 to 2013
Source: PubMed Central journal article supplement — Open Heart. 2019 Mar 30;6(1):e000959. doi: 10.1136/openhrt-2018-000959 (PMC6519410; doi:10.1136/openhrt-2018-000959), 2019-03-30

## Supplemental Material

Supplemental figure 1: Adjusted mortality: 30days post discharge to last follow up:

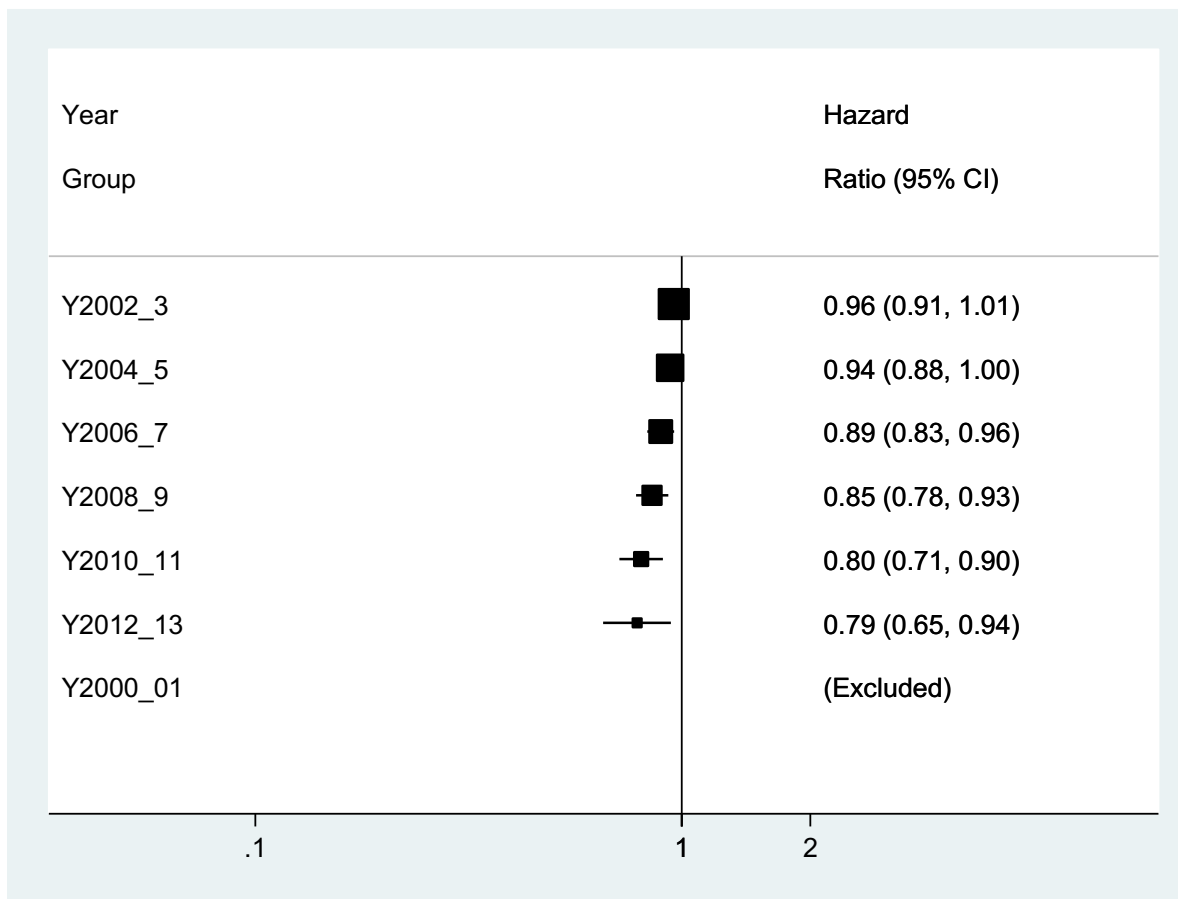

Supplemental Figure 2: Adjusted 6mth mortality for patients with complete follow up (2000-2013)

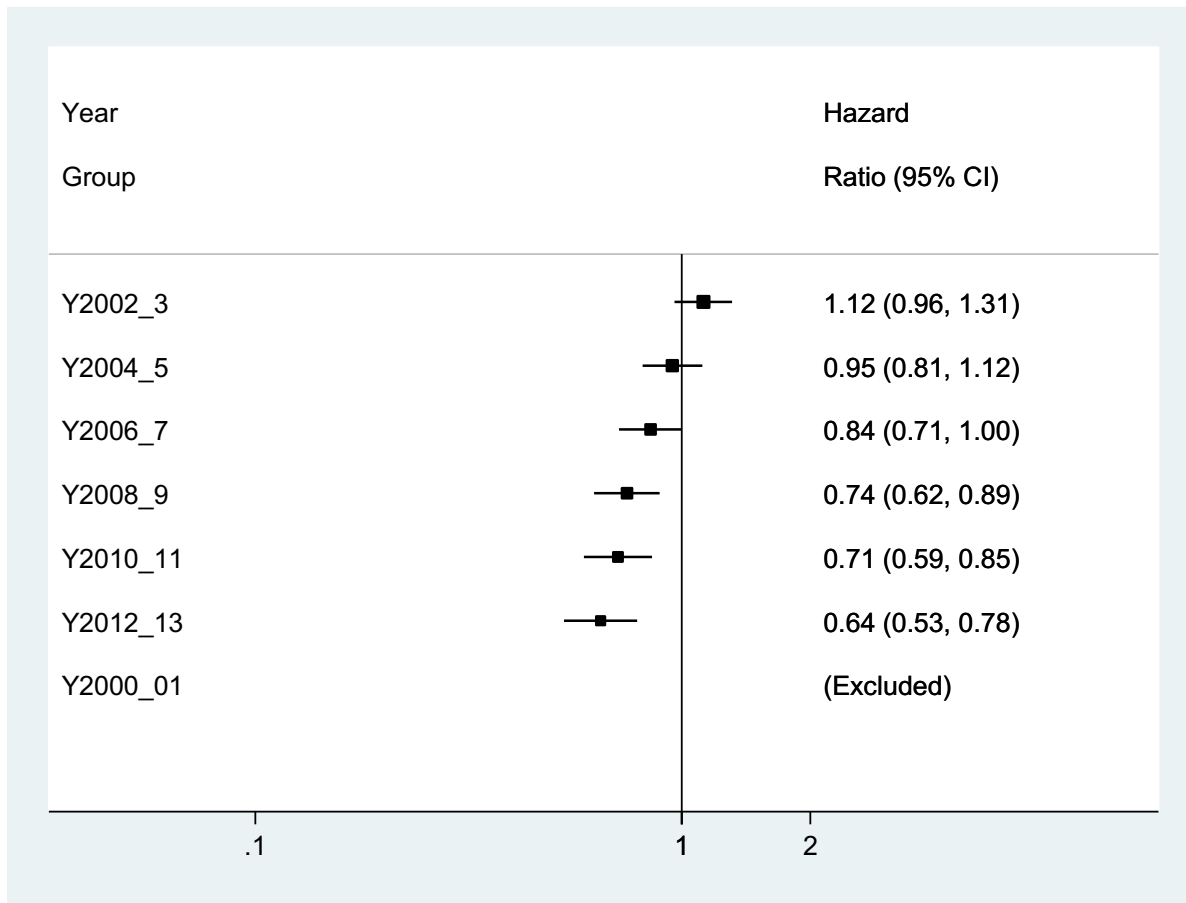

Supplemental Figure 3: Adjusted 2 year mortality for patients with complete follow up (2000-2011)

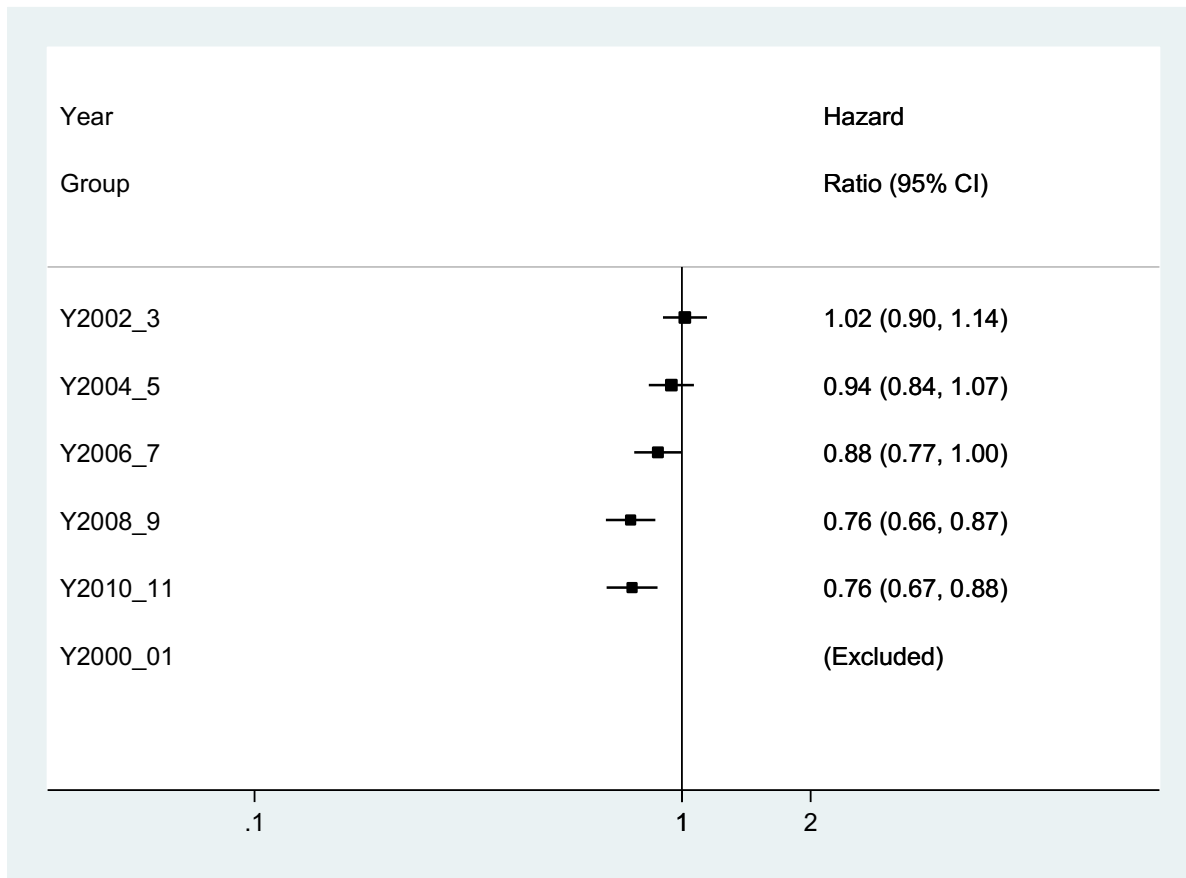

Supplemental Figure 4: Adjusted 5 year mortality for patients with complete follow up (2000-2007)

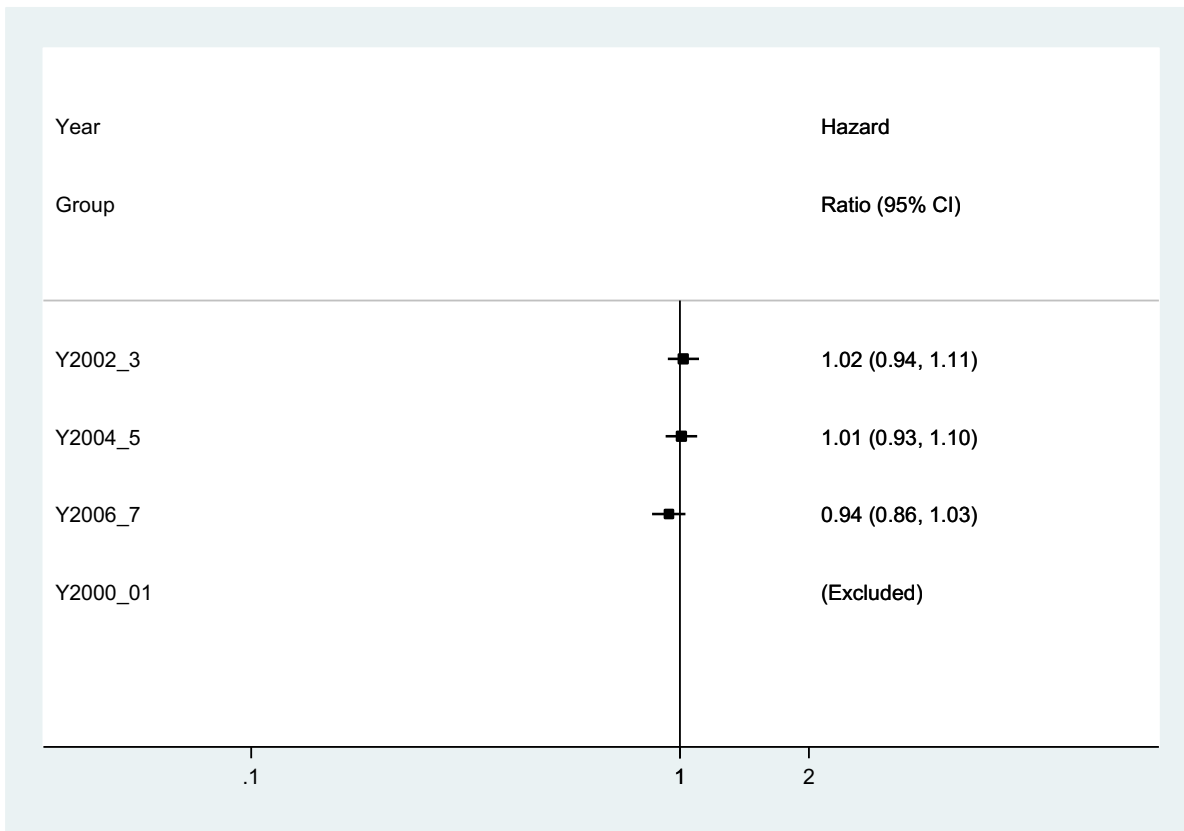

Supplement: openhrt-2018-000959supp001.pdf [file openhrt-2018-000959supp001.pdf]
